1 **Horizontal transfer of a pathway for coumarate catabolism unexpectedly**  
2 **inhibits purine nucleotide biosynthesis**

3

4 Dan M. Close<sup>1,\*</sup>, Sarah J. Cooper<sup>5</sup>, Xingyou Wang<sup>6</sup>, Richard J. Giannone<sup>2,3,4</sup>, Nancy Engle<sup>1,2,3</sup>,  
5 Timothy J. Tschaplinski<sup>1,2,3</sup>, Lizbeth Hedstrom<sup>7</sup>, Jerry M. Parks<sup>1</sup>, and Joshua K. Michener<sup>1,2,3,#</sup>

6 (1) Biosciences Division, (2) BioEnergy Science Center, (3) Center for Bioenergy Innovation,  
7 and (4) Chemical Sciences Division, 1 Bethel Valley Road, Oak Ridge National Laboratory, Oak  
8 Ridge, TN, 37830; (5) Graduate School of Genome Science and Technology, University of  
9 Tennessee, Knoxville, TN, 37996; (6) Graduate Program in Chemistry and (7) Departments of  
10 Biology and Chemistry, Brandeis University, 415 South St, Waltham MA 02454, USA. (\*)  
11 Current address: 490 BioTech, Inc. 2450 E.J. Chapman Drive, Knoxville, Tennessee 37996,  
12 USA.

13

14 (#) Correspondence should be sent to JKM (865-576-7957, [michenerjk@ornl.gov](mailto:michenerjk@ornl.gov))

15

16

17

18 This manuscript has been authored by UT-Battelle, LLC under Contract No. DE-AC05-  
19 00OR22725 with the U.S. Department of Energy. The United States Government retains and the  
20 publisher, by accepting the article for publication, acknowledges that the United States  
21 Government retains a non-exclusive, paid-up, irrevocable, world-wide license to publish or  
22 reproduce the published form of this manuscript, or allow others to do so, for United States  
23 Government purposes. The Department of Energy will provide public access to these results of  
24 federally sponsored research in accordance with the DOE Public Access Plan  
25 (<http://energy.gov/downloads/doe-public-access-plan>).

26

27 **Abstract:**

28 Metabolic pathways are frequently transferred between bacterial strains in the environment  
29 through horizontal gene transfer (HGT), yet laboratory engineering to introduce new metabolic  
30 pathways often fails. Successful use of a pathway requires co-evolution of both pathway and  
31 host, and these interactions may be disrupted upon transfer to a new host. Here we show that two  
32 different pathways for catabolism of coumarate failed to function when initially transferred into  
33 *Escherichia coli*. Using laboratory evolution, we elucidated the factors limiting activity of the  
34 newly-acquired pathways and the modifications required to overcome these limitations. Both  
35 pathways required mutations to the host to enable effective growth with coumarate, but the  
36 necessary mutations differed depending on the chemistry and intermediates of the pathways. In  
37 one case, an intermediate inhibited purine nucleotide biosynthesis, and this inhibition was  
38 relieved by single amino acid mutations to IMP dehydrogenase. A strain that natively contains  
39 this coumarate catabolism pathway, *Acinetobacter baumannii*, is already resistant to inhibition  
40 by the relevant intermediate, suggesting that natural pathway transfers have faced and overcome  
41 similar challenges. These discoveries will aid in our understanding of HGT and ability to  
42 predictably engineer metabolism.

43

44

## 45 Introduction

46 Microbes have the ability to use a wide variety of compounds as carbon and energy sources.  
47 Expanding the breadth of compounds that a strain can catabolize can be highly beneficial, both to  
48 access to new environmental niches and for engineered microbes that can use new feedstocks.  
49 Correspondingly, the catabolic pathways responsible for these abilities are frequently transferred  
50 between strains, either in nature through horizontal gene transfer (HGT) or in the laboratory  
51 through metabolic engineering (Nielsen and Keasling, 2016; Pál et al., 2005). However,  
52 depending on the precise chemistry involved, new pathways often fail to function effectively in  
53 their new host (Porse et al., 2018). In these cases, productive use of a new pathway may require  
54 post-transfer refinement to optimize expression and minimize deleterious interactions (Clark et  
55 al., 2015; Michener et al., 2014). The pathway activity immediately following transfer may be  
56 very different from the potential activity after optimization, complicating predictions about  
57 engineering or HGT.

58 Pathway selection and optimization is particularly important for the conversion of lignin-  
59 derived aromatic compounds, such as the phenylpropanoid coumarate. Use of lignocellulosic  
60 biomass as a feedstock for biofuel production yields a substantial lignin byproduct stream, which  
61 can be thermochemically depolymerized to yield complex mixtures containing multiple  
62 phenylpropanoid derivatives (Rodriguez et al., 2017). Many of these phenylpropanoids also  
63 occur naturally during lignocellulose decay and, as a result, microbes have evolved the ability to  
64 consume them as sources of carbon and energy (Bomble et al., 2017; Bugg et al., 2011). The  
65 efficient biological conversion of lignin-derived aromatic compounds into fuels and chemicals  
66 will be a key factor in making biofuel production cost-effective (Linger et al., 2014; Ragauskas  
67 et al., 2014). Successful use of the diverse mixtures of compounds produced from lignin  
68 depolymerization will require the ability to tailor a metabolic network to the particular substrate  
69 mixture. Facile assembly of a metabolic network from individual pathways will, in turn, require  
70 the elimination of any inhibitory interactions between pathways and the host.

71 We have explored these issues using pathways for catabolism of a natural phenylpropanoid,  
72 coumarate, transferred into the non-native host *E. coli*. There are two known oxidative routes for  
73 phenylpropanoid catabolism, differing in their specific reaction chemistry and resulting  
74 intermediates (Figure 1). These pathways are exemplified by the *hca* pathway from  
75 *Acinetobacter* sp. ADP1 (Parke and Ornston, 2003) and the *cou* pathway from *Rhodococcus*

76 *jostii* (Otani et al., 2014). Both pathways begin by deacetylating the phenylpropanoid substrate.  
77 The *hca* pathway then uses a retro-aldol reaction to produce an intermediate benzaldehyde  
78 derivative, while the *cou* pathway uses a hydrolytic retro-Claisen reaction to directly produce the  
79 benzoate derivative.

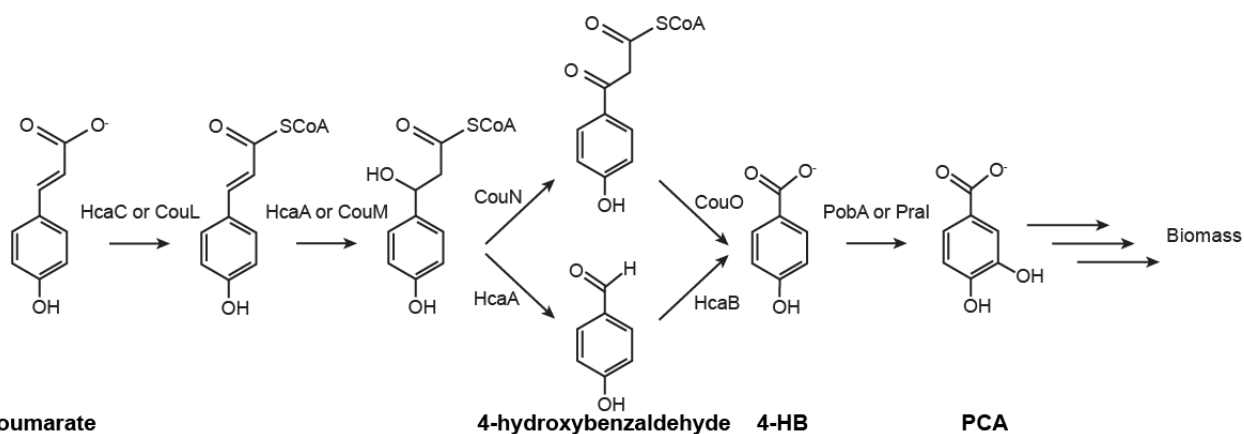

80 Coumarate

4-hydroxybenzaldehyde

4-HB

PCA

81 **Figure 1:** Two routes, exemplified by the *hcaABC* pathway from *Acinetobacter* sp. ADP1 and  
82 the *couLMNO* pathway from *R. jostii*, deacetylate the phenylpropanoid coumarate to 4-  
83 hydroxybenzoate. For simplicity, cofactors and the resulting acetyl-CoA are not shown.

84

85 However, biochemical pathways do not function in isolation, but instead are embedded in a  
86 complex network of metabolic and regulatory interactions. Transfer into a new host will disrupt  
87 these interactions, potentially interfering with either activity of the heterologous pathway or the  
88 host's native processes. Since these two phenylpropanoid pathways use different biochemistry  
89 and intermediates, their interactions with the host may also differ substantially (Kim and Copley,  
90 2012). Identifying the likeliest pairing of host and pathway, either for engineering or HGT, will  
91 depend on understanding the specific challenges imposed by each potential pathway and the  
92 mechanisms to overcome these challenges available to the host.

93 In this work, we used a combination of engineering and evolution to construct and optimize  
94 two pathways for phenylpropanoid catabolism in the common host, *E. coli*. We show that, after  
95 optimization, both the *hca* and *cou* pathways are capable of supporting growth with coumarate.  
96 However, due to differences in pathway biochemistry, the mutations required for efficient  
97 growth differ between the two pathways. The *hca* pathway produces a unique metabolite that  
98 inhibits a key enzyme in nucleotide biosynthesis, and mutations to the host are necessary to  
99 alleviate this inhibition and allow growth. Beneficial mutations to the *cou* pathway occurred

100 through different mechanisms, including mutations to an enzyme involved in cofactor salvage.  
101 Understanding these types of interactions between an engineered metabolic pathway and its  
102 heterologous host is key to building flexible metabolic networks that can easily be tailored to  
103 specific feedstocks.

104

## 105 **Results**

### 106 Combining engineering and evolution enabled coumarate catabolism

107 We designed and synthesized two pathways for phenylpropanoid import and degradation,  
108 each of which converts coumarate into 4-hydroxybenzoate (4-HB) (Figure 1 and Figure S1).  
109 Each pathway was introduced into *E. coli* strains, JME38 and JME50, that had previously been  
110 engineered to grow with 4-HB (Standaert et al., 2018). None of the engineered strains acquired  
111 the immediate ability to grow with coumarate as the sole source of carbon and energy (Figure  
112 S2).

113 To understand the factors preventing pathway function, we used experimental evolution to  
114 select for strains with the ability to catabolize coumarate. Three replicate cultures of each  
115 engineered strain were propagated in minimal medium containing 1 g/L coumarate. After 300  
116 generations, individual mutants were isolated from each population and characterized for growth  
117 with protocatechuate (PCA), 4-HB, coumarate, and caffeate. Representative isolates were chosen  
118 for each replicate population for further characterization. All isolates could grow with PCA and  
119 coumarate, though growth with caffeate and 4-HB varied between replicates (Figure S2).

120

### 121 Genome resequencing and reconstruction identified causal mutations

122 The genomes of the selected isolates were resequenced to identify new mutations (Table S1).  
123 Several of the mutations have previously been described for their effects on catabolism of 4-HB,  
124 such as silent mutations to the gene encoding the 4-hydroxybenzoate monooxygenase *pobA*  
125 (Standaert et al., 2018). Among the strains with the *hca* pathway, five of the six isolates had  
126 additional mutations to the native gene *guaB*, encoding inosine monophosphate (IMP)  
127 dehydrogenase (IMPDH), and to the intergenic region between *hcaB* and *hcaC* in the engineered  
128 pathway. The exception was JME96, which had a mutation to *rpoS* that is expected to be highly  
129 pleiotropic (Saxer et al., 2014).

130 In the strains with the *cou* pathway, the acquired mutations were less consistent across  
 131 replicates, with several mutations to genes that are expected to be pleiotropic. However, parallel  
 132 mutations were observed in JME106 and JME109, with mutations to both *couL* and *nadR*. The  
 133 mutations to *couL*, which encodes the CoA ligase, were coding mutations, L192R and S134Y.  
 134 One of the mutations to *nadR* led to a frameshift that precisely removed the C-terminal  
 135 ribosylnicotinamide kinase (RNK) domain and the second *nadR* mutation also occurred in the  
 136 RNK domain (Kurnasov et al., 2002).

137 To test the causality of the identified mutations, we reconstructed representative mutations in  
 138 the engineered parental strains. Two mutations, to *pobA* and *hcaABCK*, were necessary for  
 139 growth with coumarate in JME64, while a third mutation to *guaB* significantly increased growth  
 140 (Figure 2A). Similarly, mutations to *pobA*, *couLHTMNO*, and *nadR* were all required for growth  
 141 with coumarate using the *cou* pathway in JME65 (Figure 2B).

142

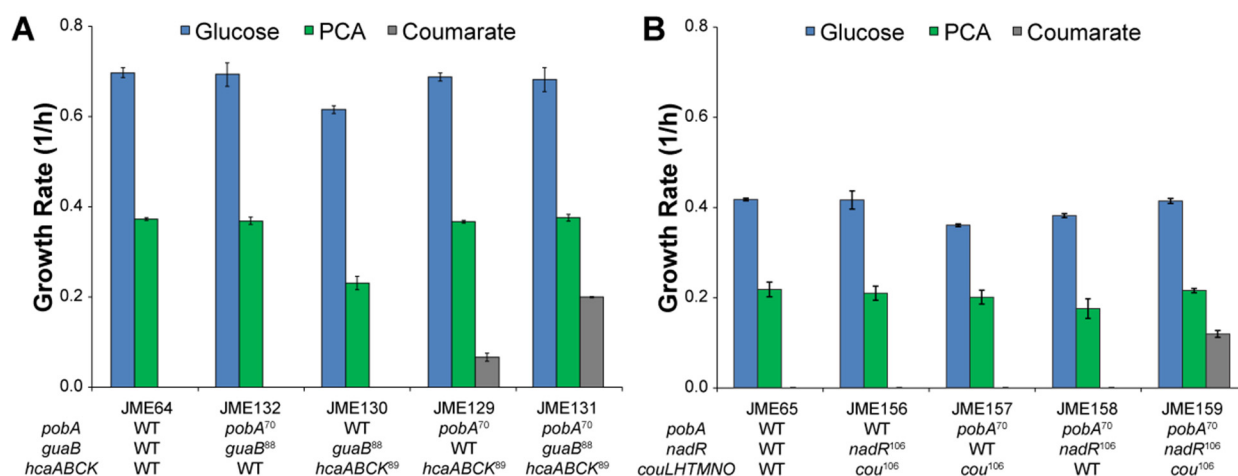

143 **Figure 2:** Reconstruction identifies causal mutations. (A) For the *hca* pathway, a triple mutant,  
 144 containing mutations to *pobA*, *guaB*, and *hcaABCK*, and the three double mutants were grown in  
 145 minimal medium with 1 g/L of the indicated substrate as the sole source of carbon and energy.  
 146 (B) As in A, except using the *cou* pathway and mutations to *pobA*, *nadR*, and *couLHTMNO*.  
 147 Error bars show one standard deviation, calculated from three biological replicates. For complex  
 148 mutations, allele superscripts indicate the evolved strain from which that allele was taken.  
 149

150

151 The *pobA* mutation has previously been shown to increase expression of *PobA* by  
 152 destabilizing secondary structures in the mRNA (Standaert et al., 2018). To understand the effect

153 of the intergenic mutations upstream of *hcaC*, we measured protein expression levels in the  
154 engineered strains. As expected, the mutation to *pobA* increased expression of PobA by  
155 approximately 9-fold, while the *hcaC* mutation increased expression of both HcaB and HcaC by  
156 roughly 2-fold (Figure S3A). The intergenic mutation before *hcaC* is predicted to increase the  
157 translation rates by approximately 10-fold (Espah Borujeni et al., 2014).

158 Parallelism of mutations within replicates of a pathway, but divergence between pathways,  
159 strongly suggests that the mutations are specific to a particular pathway. To test this hypothesis,  
160 we replaced the *hca* pathway in JME131 with either the wild-type or evolved *cou* pathways.  
161 Neither strain was able to growth with coumarate as the sole source of carbon and energy.

162

### 163 Inhibitory cross-talk between engineered and native pathways

164 A mutation to *guaB* was necessary for growth with coumarate using the *hca* pathway.  
165 IMPDH, encoded by *guaB*, converts inosine monophosphate (IMP) to xanthosine  
166 monophosphate (XMP) during purine nucleotide biosynthesis (Hedstrom, 2009). Five  
167 independent mutations to IMPDH were identified: A48V, D243G, G330D, L364Q, and P482L.  
168 We generated a model of the *E. coli* IMPDH, using multiple IMPDH crystal structures as  
169 templates and mapped the positions of mutations onto the model (Figure 3A). The mutations are  
170 scattered around the structure, with no evident common mechanism to affect the active site  
171 (Figure 3B).

172

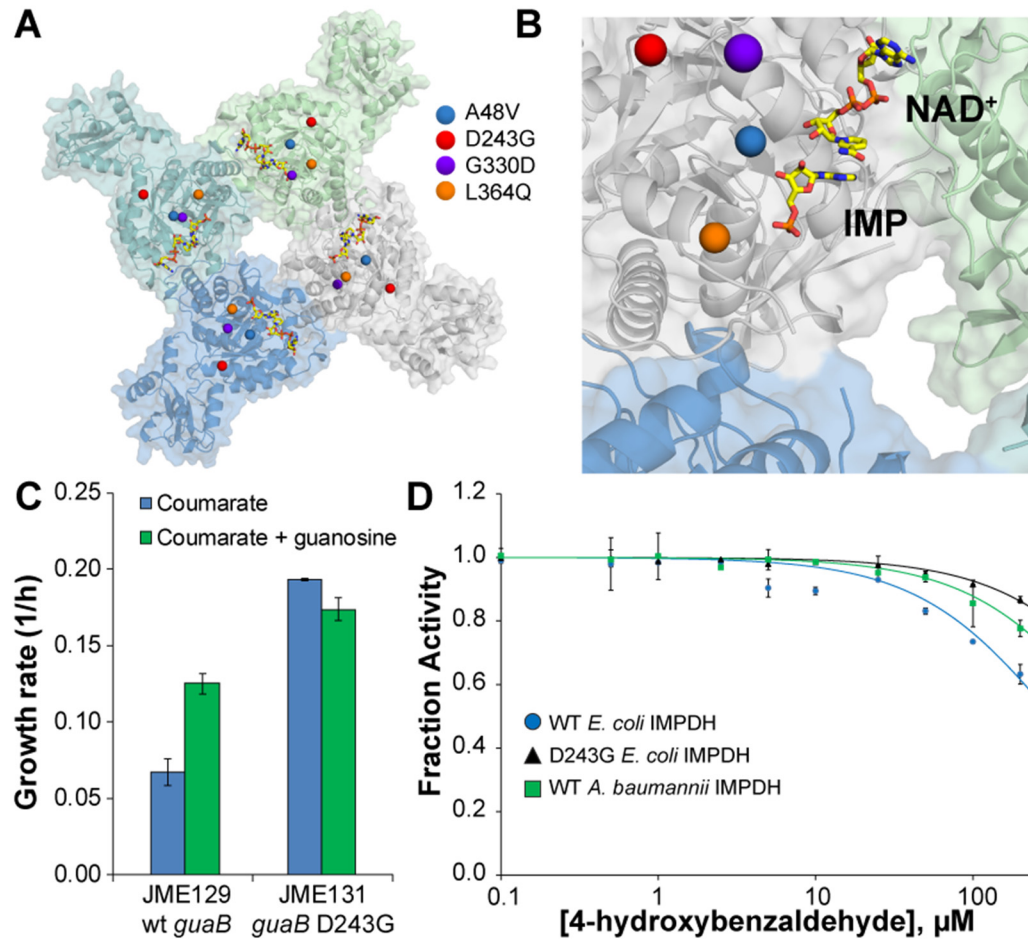

173

174 **Figure 3:** Accumulation of 4-hydroxybenzaldehyde inhibits IMPDH. (A) Positions of mutated  
175 residues in a model of the *E. coli* IMPDH. P482 was not included in the model and is not shown.  
176 Each subunit of the IMPDH tetramer is shown in a different color. (B) A detailed view of the  
177 active side of the model. IMP and NAD<sup>+</sup> are shown docked in the active site. Mutated residues  
178 are as in A. (C) Strains with wildtype and mutant versions of IMPDH were grown in medium  
179 containing 1 g/L coumarate with and without the addition of 5 mg/L guanosine. No growth was  
180 seen with guanosine alone. Error bars show the standard deviation, calculated from three  
181 biological replicates. (D) Enzyme variants were purified and assayed *in vitro* for inhibition by 4-  
182 hydroxybenzaldehyde. Curves show a model fit, using the calculated inhibition constants. Error  
183 bars show the standard deviation, calculated from three biological replicates.

184

185 To understand the consequences of these mutations, we measured metabolite levels in the  
186 parent and engineered strains during growth with coumarate. Compared to the D243G *guaB*



187 mutant, the strain with wild-type *guaB* showed higher levels of AMP (Figure S4).  
188 Concentrations of GMP and IMP were below the limit of detection of our assay. These results  
189 suggested that growth with coumarate perturbed the purine nucleotide pools.

190 We hypothesized that growth with coumarate led to inhibition of IMPDH and depletion of  
191 guanine nucleotides, and that this inhibition was relieved in the *guaB* mutants. To determine  
192 whether guanine nucleotide depletion inhibited growth with coumarate, we supplemented the  
193 growth medium with guanosine. Addition of guanosine increased growth with coumarate in a  
194 strain with the wildtype IMPDH, but not the mutant (Figure 3C).

195 Mutations to IMPDH improved growth with the *hca* pathway but not with the *cou* pathway.  
196 The *hca* pathway produces an intermediate, 4-hydroxybenzaldehyde, that is not present in the  
197 *cou* pathway (Figure 1). To test whether this intermediate was responsible for the inhibition of  
198 IMPDH, we purified WT and mutant IMPDH and measured inhibition *in vitro* with 4-  
199 hydroxybenzaldehyde. This compound is a weak inhibitor of WT *Ec*IMPDH, with a  $K_{i,app}$  of  $320$   
200  $\pm 20$   $\mu\text{M}$  (Figure 3C). Introduction of the D243G mutation had little effect on catalytic activity  
201 (Table S5) but increased the  $K_{i,app}$  to  $1250 \pm 50$   $\mu\text{M}$ , indicating a substantial reduction of  
202 inhibition in the mutant. The *hca* pathway that we used came from *Acinetobacter* sp. ADP1, and  
203 we hypothesized that the native IMPDH of this strain would have faced similar selective  
204 pressures to minimize inhibition by 4-hydroxybenzaldehyde. As a surrogate, we tested the  
205 IMPDH of *A. baumannii*, which contains a homologous *hca* pathway. As predicted, the *A.*  
206 *baumannii* IMPDH has a  $K_{i,app}$  of  $720 \pm 30$   $\mu\text{M}$ . Further kinetic characterization of these IMPDH  
207 homologs is summarized in Table S5.

208 In the IMPDH model, the carboxylate side chain of D243 forms hydrogen bonds with the  
209 backbone of V220 and the side chain of K87, which would be disrupted in the D243G mutant  
210 (Figure S6). K87 is located at the C-terminal end of a long  $\alpha$  helix, and V220 is at the beginning  
211 of a  $\beta$  strand. It is not obvious how these local changes might be propagated to the active site to  
212 relieve inhibition without affecting catalysis.

213

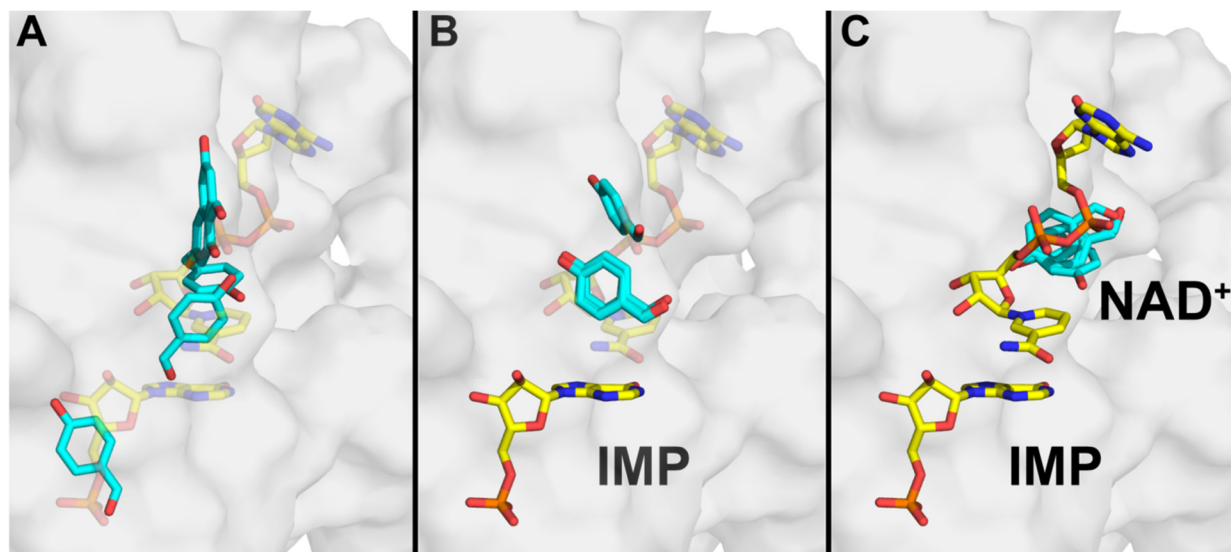

214  
215 **Figure 4.** Predicted docking poses for 4-hydroxybenzaldehyde to IMPDH in various enzyme  
216 states. (A) Apoenzyme, (B) IMP-bound, and (C) IMP/NAD<sup>+</sup>-bound IMPDH. The top five  
217 docking poses are shown in each case. 4-hydroxybenzaldehyde carbons are shown in cyan. All  
218 other carbons are shown in yellow. Molecules in transparent representation are shown for  
219 reference, but were not included in the docking. All hydrogens are omitted for clarity.

220  
221 To gain insight into possible mechanisms of inhibition by 4-hydroxybenzaldehyde, we  
222 computationally docked 4-hydroxybenzaldehyde to the wild-type IMPDH model in the  
223 apoenzyme, IMP-bound, and IMP/NAD<sup>+</sup>-bound states (Figure 4). As a test of our modeling and  
224 docking approach, we first redocked IMP and NAD<sup>+</sup> into their respective binding sites in the  
225 apoenzyme and compared the resulting models with relevant template structures containing these  
226 molecules. Whereas the top docked pose of NAD<sup>+</sup> deviates slightly (1.1 Å RMSD) from its  
227 position in the crystal structure, IMP is essentially superimposable (0.3 Å RMSD) with the  
228 corresponding crystallographic coordinates of XMP (PDB entry 4X3Z). Thus, we deemed our  
229 approach sufficiently accurate to dock 4-hydroxybenzaldehyde to each of the three models. In  
230 both the apoenzyme and IMP-bound models, the majority of the top poses of 4-  
231 hydroxybenzaldehyde occupy the NAD<sup>+</sup> binding site (Table S7). However, the structural  
232 changes that we predict would occur in the mutant enzymes do not significantly change these  
233 binding interactions.

234

235 **Discussion**

236 The *hca* pathway shows clear signs of HGT, with highly homologous pathways present in  
237 various beta- and gamma-proteobacteria. In this work, we have recapitulated the process of  
238 HGT, and demonstrated the necessity for host adaptations to accommodate the pathway in both  
239 *E. coli* and *A. baumannii*. Further HGT of this pathway would require either a host with an  
240 IMPDH homolog that is resistant to inhibition by 4-hydroxybenzaldehyde, or post-transfer  
241 selection for mutations that relieve inhibition. Understanding these types of limitations on HGT,  
242 and the mechanisms by which organisms evolve to avoid them, will aid in our ability to predict  
243 and manipulate horizontal gene transfer (Clark et al., 2015; Michener et al., 2014).

244 In combination, our results suggest that introduction of the *hca* pathway did not allow growth  
245 with coumarate because accumulation of 4-hydroxybenzaldehyde inhibited the native *E. coli*  
246 IMPDH. This inhibitory cross-talk results in nucleotide starvation and impairs growth and  
247 phenylpropanoid catabolism. Mutations to IMPDH prevent inhibition by 4-hydroxybenzaldehyde  
248 and allow growth with coumarate. There is no *a priori* reason to expect that a pathway for  
249 degradation of an aromatic compound would interact with a native pathway for nucleotide  
250 biosynthesis. Phenolic amides such as feruloyl amide have been shown to inhibit a different step  
251 in nucleotide biosynthesis (Pisithkul et al., 2015), but neither the substrate nor products of  
252 coumarate degradation are toxic at the relevant concentrations (Clarkson et al., 2017; Standaert  
253 et al., 2018). These types of inhibitory cross-talk are likely to be common with introduced  
254 metabolic pathways, though they are rarely identified and alleviated (Kim and Copley, 2012;  
255 Kizer et al., 2008; Michener et al., 2012). As we have shown, relatively subtle changes in  
256 pathway structure, such as the differences between the *hca* and *cou* pathways, can dramatically  
257 change the interactions between a pathway and its host.

258 Across the replicate populations, many mutations were highly pleiotropic, including large  
259 insertions and deletions as well as mutations to core transcriptional machinery such as *rho* and  
260 *rpoB*. Duplications frequently spanned the insertion sites for engineered operons, suggesting that  
261 expression of the heterologous genes was limiting. By comparing across replicates, however, we  
262 were able to identify a set of point mutations that allowed growth with coumarate as the sole  
263 source of carbon and energy. However, a reconstructed strain containing these mutations does  
264 not grow as quickly with coumarate as the evolved isolates, suggesting that some of the  
265 remaining mutations provided additional fitness benefits (Figure 2 and Figure S2).

266 The phenylpropanoid CoA ligases, *couL* and *hcaC*, both required mutations for full  
267 heterologous activity. The mutations to *hcaC* increased expression, presumably by modulating  
268 translation, while the mutations to *couL* decreased expression (Figure S3B). Without direct  
269 measurements, we cannot say whether the mutations to CouL also affected the specific activity  
270 of the enzyme, or whether the observed change in expression is the sole explanation for the  
271 observed benefit. Similarly, it is unclear what role the *nadR* truncation plays in coumarate  
272 degradation using the *cou* pathway. The C-terminal ribosylnicotinamide kinase domain is  
273 involved in a minor pathway for NAD<sup>+</sup> salvage. This domain may be promiscuously  
274 phosphorylating an intermediate in the *cou* pathway.

275 Inhibition of microbial growth by aldehydes is commonly observed, though the mechanisms  
276 of toxicity can rarely be traced to a specific interaction (Clarkson et al., 2014; Mills et al., 2009;  
277 Yi et al., 2015). Mutations that increase tolerance generally do so either by increasing export of  
278 the toxic compound or by performing redox chemistry to remove the aldehyde functionality  
279 (Mukhopadhyay, 2015). In this work, we have shown an example of aldehyde toxicity that acts  
280 through a single protein and can be relieved by point mutations to that protein. Other examples  
281 of nonspecific toxicity may prove to be similarly specific when characterized fully.

282 We have described the use of experimental evolution to identify and alleviate deleterious  
283 interactions between engineered metabolic pathways for coumarate catabolism and native  
284 pathways for nucleotide biosynthesis and cofactor salvage. Many engineered pathways place a  
285 substantial burden on the production host, but understanding and accommodating these  
286 interactions remains challenging. Evolution can simplify this optimization process by directly  
287 selecting for mutations that eliminate the inhibition. As we did with *guaB*, researchers can then  
288 work backwards from the evolutionary solutions to understand the factors that were initially  
289 limiting productivity and the biochemical solutions to overcome those problems. By solving  
290 more problems of this sort, we will develop design rules for future forward engineering of  
291 decoupled metabolic pathways and better predictions of the likelihood of pathway transfer by  
292 HGT.

293

## 294 **Materials and Methods**

295 Strains and chemicals

296 Unless otherwise noted, all chemicals were purchased from Sigma-Aldrich (St. Louis, MO)  
297 or Fisher Scientific (Fairlawn, NJ) and were molecular grade. All oligonucleotides were ordered  
298 from IDT (Coralville, IA). *E. coli* strains were routinely cultivated at 37 °C in LB containing the  
299 necessary antibiotics (50 mg/L kanamycin or 50 mg/L spectinomycin). Growth assays with  
300 aromatic substrates were performed in M9 salts medium containing 300 mg/L thiamine and 1  
301 mM isopropyl  $\beta$ -D-1-thiogalactopyranoside (IPTG). PCA and 4-HB were dissolved in water at 5  
302 g/L, filter sterilized, and added at a final concentration of 1 g/L. Coumarate and caffeate were  
303 dissolved in DMSO at 100 g/L and added at a final concentration of 1 g/L. The addition of 1%  
304 DMSO did not affect growth. The pH of the substrates was not controlled, as PCA oxidation  
305 occurred more rapidly at neutral pH.

306

#### 307 Plasmid construction

308 Plasmids pJM219 and pJM223, containing the *cou* and *hca* expression constructs, were  
309 synthesized by the Joint Genome Institute. As described previously, the pathway design used  
310 synthetic promoters, terminators, and custom ribosome binding sites (Chen et al., 2013; Espah  
311 Borujeni et al., 2014; Kosuri et al., 2013; Salis et al., 2009). Plasmids expressing sgRNA for  
312 chromosomal modifications were constructed as described previously, using an inverse PCR to  
313 linearize the expression vector followed by assembly with synthesized oligonucleotides  
314 (Clarkson et al., 2017). Plasmid pJM303, expressing the D243G mutant of the *E. coli* IMPDH,  
315 was constructed by amplifying the mutant *guaB* allele from JME89 and cloning it into pMCSG7  
316 under the control of a T7 promoter.

317

#### 318 Strain construction

319 Genome modifications were performed as described previously, using the lambda-red  
320 recombineering system in combination with Cas9-mediated selection (Clarkson et al., 2017;  
321 Jiang et al., 2015). Integration cassettes were amplified from synthesized plasmids or the  
322 chromosomal DNA of mutant strains, as needed.

323

#### 324 Experimental evolution

325 Parental strains were streaked to single colonies. Three colonies from each strain were grown  
326 to saturation in LB + 1 mM IPTG, then diluted 128-fold into M9 + 1 mM IPTG + 1 g/L

327 coumarate + 50 mg/L PCA and grown at 37 °C. When the cultures reached saturation, typically  
328 after two days during the initial stages, they were diluted 128-fold into fresh medium. As the  
329 growth became more robust, the PCA concentration was decreased. Cultures derived from  
330 JME65 and JME67 required the addition of PCA for 150 generations, and in some cases took  
331 two days to reach saturation even after 300 generations. One replicate culture, JME65-C, became  
332 contaminated with a different coumarate-degrading strain. This contamination was not  
333 discovered until resequencing, and consequently the culture was not restarted.

334 After 300 generations, the evolved cultures were streaked to single colonies. Six isolates  
335 from each replicate culture were tested for growth with PCA, 4-HB, coumarate, and caffeate.  
336 Representative isolates were selected and validated, followed by genome resequencing.

337

### 338 Genome resequencing

339 Genomic DNA was isolated using a Blood and Tissue kit (Qiagen, Valencia, CA), according  
340 to the manufacturer's directions. The DNA was then sequenced by the Joint Genome Institute on  
341 a MiSeq (Illumina, San Diego, CA) to approximately 75x coverage.

342

### 343 Growth rate measurements

344 Growth rates were measured as described previously (Clarkson et al., 2017). Briefly, cultures  
345 were grown overnight to saturation in M9 + 1 mM IPTG + 2 g/L glucose. They were then diluted  
346 100-fold into fresh M9 + IPTG containing the appropriate carbon source and grown as triplicate  
347 100 µL cultures in a Bioscreen C plate reader (Oy Growth Curves Ab Ltd, Helsinki, Finland).  
348 Growth rates were calculated using CurveFitter software based on readings of optical density at  
349 600 nm (Delaney et al., 2013).

350

### 351 Proteomic measurements

352 Engineered *E. coli* strains were grown to saturation in 5 mL cultures of M9 + 2 g/L glucose +  
353 1 mM IPTG. They were then diluted 100-fold into triplicate 5 mL of the same medium and  
354 grown to mid-log phase. The cells were separated by centrifugation, washed twice with water,  
355 and frozen in LN<sub>2</sub> for later analysis.

356 Processing for LC-MS/MS analysis was performed as previously described (Clarkson et  
357 al., 2017). Briefly, crude protein lysates were obtained by bead beating cells in sodium

358 deoxycholate (SDC) lysis buffer (4% SDC, 100 mM ammonium bicarbonate, pH 8.0). Cleared  
359 protein lysates were then adjusted to 10 mM dithiothreitol and incubated at 95 °C for 10 min to  
360 denature and reduce proteins. Cysteines were alkylated/blocked with 30 mM iodoacetamide and  
361 250 µg transferred to a 10-kDa MWCO spin filter (Vivaspin 500, Sartorius) for *in situ* clean-up  
362 and digestion with sequencing-grade trypsin (G-Biosciences). The tryptic peptide solution was  
363 then spin-filtered through the MWCO membrane, adjusted to 1% formic acid to precipitate  
364 residual SDC, and SDC precipitate removed from the peptide solution with water-saturated ethyl  
365 acetate extraction. Peptide samples were then concentrated via SpeedVac (Thermo Fisher) and  
366 quantified by BCA assay (Pierce) prior to LC-MS/MS analysis.

367 Peptide samples were analyzed by automated 2D LC-MS/MS analysis using a Vanquish  
368 UHPLC plumbed directly in-line with a Q Exactive Plus mass spectrometer (Thermo Scientific)  
369 outfitted with a triphasic MudPIT back column (RP-SCX-RP) coupled to an in-house pulled  
370 nanospray emitter packed with 30 cm of 5 µm Kinetex C18 RP resin (Phenomenex). For each  
371 sample, 5 µg of peptides were loaded, desalted, separated and analyzed across two successive  
372 salt cuts of ammonium acetate (50 mM and 500 mM), each followed by 105 min organic  
373 gradient, as previously detailed (Clarkson et al., 2017). Eluting peptides were measured and  
374 sequenced by data-dependent acquisition on the Q Exactive MS.

375 MS/MS spectra were searched against the *E. coli* K-12 proteome concatenated with  
376 exogenous Pca, Hca, and Cou pathway proteins, common protein contaminants, and decoy  
377 sequences using MyriMatch v.2.2 (Tabb et al., 2007). Peptide spectrum matches (PSM) were  
378 required to be fully tryptic with any number of missed cleavages; a static modification of  
379 57.0214 Da on cysteine (carbamidomethylated) and a dynamic modification of 15.9949 Da on  
380 methionine (oxidized) residues. PSMs were filtered using IDPicker v.3.0 (Ma et al., 2009) with  
381 an experiment-wide false-discovery rate controlled at < 1% at the peptide-level. Peptide  
382 intensities were assessed by chromatographic area-under-the-curve and unique peptide intensities  
383 summed to estimate protein-level abundance. Protein abundance distributions were then  
384 normalized across samples and missing values imputed to simulate the MS instrument's limit of  
385 detection. Significant differences in protein abundance were assessed by pairwise T-test.

386

387 Metabolite measurements

388 Strains were grown to saturation in 5 mL cultures of M9 + 2 g/L glucose + 1 mM IPTG.  
389 They were then diluted into 250 mL of M9 + 0.5 g/L glucose + 1 g/L coumarate + 1 mM IPTG  
390 and grown for a further 8 hours. The cells were separated by centrifugation, washed twice with  
391 water, and frozen in LN<sub>2</sub> for later analysis.

392 Frozen cell pellets were weighed into centrifuge tubes containing 5 mL of 80% ethanol, and  
393 75 µL sorbitol (1 mg/mL) added as an internal standard. Samples were sonicated for 3 min (30 s  
394 on, 30 s off with an amplitude of 30%) while being kept cold in a cooling rack that had been  
395 chilled with liquid nitrogen. Samples were then centrifuged at 4500 rpm for 20 min, the  
396 supernatant decanted and a 1 mL aliquot was dried under a nitrogen stream, dissolved in 0.5 mL  
397 acetonitrile, and silylated to generate trimethylsilyl derivatives (Tschaplinski et al., 2012). After  
398 2 days, 1 µL aliquots were injected into an Agilent 5975C inert XL gas chromatograph-mass  
399 spectrometer (GC-MS). The standard quadrupole GC-MS was operated in electron impact (70  
400 eV) ionization mode, targeting 2.5 full-spectrum (50-650 Da) scans per second (Tschaplinski et  
401 al., 2012).

402 Metabolite peaks were extracted using a key selected ion, characteristic m/z fragment to  
403 minimize integration of co-eluting metabolites. The extracted peaks of known metabolites were  
404 scaled back to the total ion current (TIC) using scaling factors previously calculated. Peaks were  
405 quantified by area integration and normalized to the quantity of internal standard recovered,  
406 amount of sample extracted, derivatized, and injected. A large user-created database and the  
407 Wiley Registry 10th Edition/NIST 2014 Mass Spectral Library was used to identify the  
408 metabolites of interest to be quantified. Unidentified metabolites were represented by their  
409 retention time and key m/z ratios.

410

#### 411 IMPDH expression and purification

412 NAD<sup>+</sup> was purchased from Roche, IMP and EDTA were purchased from Fisher, MOPS was  
413 purchased from Sigma, DTT and IPTG were purchased from GoldBio. EcIMPDH/WT and  
414 AbIMPDH were purified as previously described (Makowska-Grzyska et al., 2015). pJM303,  
415 expressing EcIMPDH/D243G was transformed into BL21(*ΔguaB*) cells that lack endogenous  
416 EcIMPDH (MacPherson et al., 2010). An overnight culture (5 mL) was diluted into 1 L of fresh  
417 LB broth containing 100 µg/mL ampicillin and grown at 37 °C. Once the culture reached an  
418 OD<sub>600</sub> of 0.6-0.8, IPTG was added to a final concentration of 0.25 mM to induce expression of



419 IMPDH. After 13 h at 30 °C, the cells were collected by centrifugation. All the operations below  
420 were performed at 4 °C. The pellet was resuspended in 50 mL phosphate buffer (pH = 8.0)  
421 containing 1 mM dithiothreitol (DTT) and sonicated. The debris was removed by centrifugation  
422 at 10,000 g at 4 °C for 1 h.

423 The enzyme in the supernatant was purified by nickel affinity chromatography. The Ni-NTA  
424 resin equilibrated with water and phosphate buffer (pH = 8.0). Lysate was loaded onto the 10 mL  
425 column with 5 mL resin and washed with 50 mL phosphate buffer (pH = 8.0) then 50 mL  
426 phosphate buffer containing 25 mM imidazole. Enzyme was eluted in 25 ml phosphate buffer  
427 with 250 mM imidazole. The fractions with IMPDH activity were identified by enzyme activity  
428 assays, combined and dialyzed in 25 mM HEPES (pH = 8.0), 1mM DTT and 1 mM EDTA.  
429 Protein concentration was determined by Bio-Rad Bradford assay using IgG as a standard. The  
430 assay over-estimates the concentration of IMPDH by a factor of 2.6, and protein concentration  
431 was adjusted accordingly (Wang et al., 1996).

432

#### 433 IMPDH enzyme assays

434 The IMPDH reaction was monitored by measuring the rate of NADH production on a  
435 Shimadzu UV-1800 Spectrometer at  $\lambda = 340$  nm. MOPS buffer (pH = 7.0) was used to reduce  
436 the background absorbance of 4HB. The assay buffer was composed by 20 mM MOPS (pH  
437 =7.0), 100 mM KCl, 1 mM EDTA and 1 mM DTT. The final volume of each cuvette was 1 mL.

438 Kinetic parameters with respect to NAD<sup>+</sup> were determined by measuring the initial velocity  
439 for varying concentrations of NAD<sup>+</sup> at a fixed saturating concentration of IMP (1.2 mM) and 50  
440 nM of enzyme. Kinetic parameters with respect to IMP were determined by measuring the initial  
441 velocity for varying concentrations of IMP at a fixed saturating concentration of NAD<sup>+</sup> (2.5  
442 mM) and 50 nM of enzyme. Initial velocities were plotted against substrate concentrations and  
443 the data were fit using SigmaPlot. The values of  $K_{i,app}$  were determined by measuring the initial  
444 velocities for the reaction of IMPDH (20 nM) in the presence of varied concentrations (0-300  
445  $\mu$ M) of 4-hydroxybenzaldehyde at 12  $\mu$ M of IMP and 500  $\mu$ M of NAD<sup>+</sup>. The inhibition by 4-  
446 hydroxybenzaldehyde under physiological concentrations of IMP (270  $\mu$ M) and NAD<sup>+</sup> (2500  
447  $\mu$ M) were determined as well (Bennett et al., 2009; Park et al., 2016).

448

#### 449 Comparative modeling

450 HHpred (Zimmermann et al., 2017) was used to search the Protein Databank for suitable  
451 structural templates to model IMPDH from *E. coli* (accession number P0ADG7). Five templates  
452 were chosen on the basis of their similarity to the query sequence, inclusion of cofactors and  
453 substrates, or both (Table S6). Whereas all templates include the catalytic ( $\beta/\alpha$ )<sub>8</sub> domain, only  
454 1ZFJ includes the cystathionine beta synthase (CBS) domain. Only 4X3Z includes the NAD<sup>+</sup>  
455 cofactor, but it includes XMP instead of IMP. Thus, these two templates were assigned a higher  
456 weight during comparative modeling. The query and template sequences were aligned with  
457 MAFFT (L-INS-i) (Kato and Standley, 2013) (Figure S5), and the wild-type IMPDH sequence  
458 was threaded onto each template structure.

459 We then used RosettaCM (Song et al., 2013) to generate comparative models of IMPDH.  
460 Fragment files were obtained with the Robetta web server (Gront et al., 2011; Kim et al., 2004).  
461 We used an iterative approach in which we first generated 1,000 models with all five templates.  
462 We then selected the top model along with the 4X3Z and 1ZFJ templates and generated an  
463 additional 1,000 models. Three iterations were carried out to obtain the final model used for  
464 ligand docking.

465

#### 466 Ligand docking

467 Structure files in mol2 format for IMP (ZINC04228242), NAD<sup>+</sup> (ZINC08214766), and 4-  
468 hydroxybenzaldehyde (ZINC00156709) were obtained from <http://zinc.docking.org> (Irwin et al.,  
469 2012) and then converted to Rosetta format. RosettaLigand (Meiler and Baker, 2006) was then  
470 used to dock the inhibitor 4-hydroxybenzaldehyde into the active site of IMPDH following a  
471 previously described protocol (Combs et al., 2013). Top binding poses were ranked on the basis  
472 of their ‘interface\_delta\_X’ score in Rosetta energy units. Additional details of the comparative  
473 modeling and ligand docking are provided in the Supporting Information.

474

#### 475 Acknowledgments

476 Genome resequencing and analysis was performed by Christa Pennacchio, Natasha Brown,  
477 Anna Lipzen, and Wendy Schackwitz at the Joint Genome Institute. DNA synthesis was  
478 performed by Jan-Fang Cheng, Samuel Deutsch, and Miranda Harmon-Smith at the Joint  
479 Genome Institute. The work conducted by the U.S. Department of Energy Joint Genome  
480 Institute, a DOE Office of Science User Facility, is supported by the Office of Science of the

481 U.S. Department of Energy under Contract No. DE-AC02-05CH11231. This work was  
482 supported by the BioEnergy Science Center and The Center for Bioenergy Innovation, both U.S.  
483 Department of Energy Research Centers supported by the Office of Biological and  
484 Environmental Research in the DOE Office of Science; the National Institutes of Health  
485 (GM054403 to LH); and the ORNL Laboratory Directed Research and Development program  
486 (#8949 to JMP). SJC was supported by NIH/NIGMS-IMSD Grant No. R25GM086761. This  
487 material is based upon work supported by the National Science Foundation Graduate Research  
488 Fellowship under Grant No. (2017219379). Oak Ridge National Laboratory (ORNL) is managed  
489 by UT-Battelle, LLC, for the DOE under Contract No. DE-AC05-00OR22725.

490

## 491 **References**

- 492 Bennett, B.D., Kimball, E.H., Gao, M., Osterhout, R., Van Dien, S.J., Rabinowitz, J.D., 2009.  
493 Absolute metabolite concentrations and implied enzyme active site occupancy in  
494 *Escherichia coli*. *Nat. Chem. Biol.* 5, 593–599. doi:10.1038/nchembio.186
- 495 Bomble, Y.J., Lin, C.-Y., Amore, A., Wei, H., Holwerda, E.K., Ciesielski, P.N., Donohoe, B.S.,  
496 Decker, S.R., Lynd, L.R., Himmel, M.E., 2017. Lignocellulose deconstruction in the  
497 biosphere. *Curr. Opin. Chem. Biol.* 41, 61–70. doi:10.1016/J.CBPA.2017.10.013
- 498 Bugg, T.D.H., Ahmad, M., Hardiman, E.M., Rahmanpour, R., 2011. Pathways for degradation of  
499 lignin in bacteria and fungi. *Nat. Prod. Rep.* 28, 1883. doi:10.1039/c1np00042j
- 500 Chen, Y.-J., Liu, P., Nielsen, A.A.K., Brophy, J.A.N., Clancy, K., Peterson, T., Voigt, C.A.,  
501 2013. Characterization of 582 natural and synthetic terminators and quantification of their  
502 design constraints. *Nat. Methods* 10, 659–664. doi:10.1038/nmeth.2515
- 503 Clark, I.C., Melnyk, R.A., Youngblut, M.D., Carlson, H.K., Iavarone, A.T., Coates, J.D., 2015.  
504 Synthetic and evolutionary construction of a chlorate-reducing *Shewanella oneidensis* MR-  
505 1. *MBio* 6, e00282-15. doi:10.1128/mBio.00282-15
- 506 Clarkson, S.M., Hamilton-Brehm, S.D., Giannone, R.J., Engle, N.L., Tschaplinski, T.J., Hettich,  
507 R.L., Elkins, J.G., 2014. A comparative multidimensional LC-MS proteomic analysis  
508 reveals mechanisms for furan aldehyde detoxification in *Thermoanaerobacter*  
509 *pseudethanolicus* 39E. *Biotechnol. Biofuels* 7, 165. doi:10.1186/s13068-014-0165-z
- 510 Clarkson, S.M., Kridelbaugh, D.M., Elkins, J.G., Guss, A.M., Michener, J., 2017. Construction  
511 and optimization of a heterologous pathway for protocatechuate catabolism in *Escherichia*

- 512 coli enables rapid bioconversion of model lignin monomers. *Appl. Environ. Microbiol.* 83,  
513 e01313-17. doi:10.1128/AEM.01313-17
- 514 Combs, S.A., DeLuca, S.L., DeLuca, S.H., Lemmon, G.H., Nannemann, D.P., Nguyen, E.D.,  
515 Willis, J.R., Sheehan, J.H., Meiler, J., 2013. Small-molecule ligand docking into  
516 comparative models with Rosetta. *Nat. Protoc.* 8, 1277–1298. doi:10.1038/nprot.2013.074
- 517 Delaney, N.F., Kaczmarek, M.E., Ward, L.M., Swanson, P.K., Lee, M.-C., Marx, C.J., 2013.  
518 Development of an optimized medium, strain and high-throughput culturing methods for  
519 *Methylobacterium extorquens*. *PLoS One* 8, e62957. doi:10.1371/journal.pone.0062957
- 520 Espah Borujeni, A., Channarasappa, A.S., Salis, H.M., 2014. Translation rate is controlled by  
521 coupled trade-offs between site accessibility, selective RNA unfolding and sliding at  
522 upstream standby sites. *Nucleic Acids Res.* 42, 2646–59. doi:10.1093/nar/gkt1139
- 523 Gront, D., Kulp, D.W., Vernon, R.M., Strauss, C.E.M., Baker, D., 2011. Generalized Fragment  
524 Picking in Rosetta: Design, Protocols and Applications. *PLoS One* 6, e23294.  
525 doi:10.1371/journal.pone.0023294
- 526 Hedstrom, L., 2009. IMP dehydrogenase: structure, mechanism, and inhibition. *Chem. Rev.* 109,  
527 2903–28. doi:10.1021/cr900021w
- 528 Irwin, J.J., Sterling, T., Mysinger, M.M., Bolstad, E.S., Coleman, R.G., 2012. ZINC: A Free  
529 Tool to Discover Chemistry for Biology. *J. Chem. Inf. Model.* 52, 1757–1768.  
530 doi:10.1021/ci3001277
- 531 Jiang, Y., Chen, B., Duan, C., Sun, B., Yang, J., Yang, S., 2015. Multigene editing in the  
532 *Escherichia coli* genome via the CRISPR-Cas9 system. *Appl. Environ. Microbiol.* 81,  
533 2506–2514. doi:10.1128/AEM.04023-14
- 534 Katoh, K., Standley, D.M., 2013. MAFFT Multiple Sequence Alignment Software Version 7:  
535 Improvements in Performance and Usability. *Mol. Biol. Evol.* 30, 772–780.  
536 doi:10.1093/molbev/mst010
- 537 Kim, D.E., Chivian, D., Baker, D., 2004. Protein structure prediction and analysis using the  
538 Robetta server. *Nucleic Acids Res.* 32, W526–W531. doi:10.1093/nar/gkh468
- 539 Kim, J., Copley, S.D., 2012. Inhibitory cross-talk upon introduction of a new metabolic pathway  
540 into an existing metabolic network. *Proc. Natl. Acad. Sci.* 109, E2856–E2864.  
541 doi:10.1073/pnas.1208509109
- 542 Kizer, L., Pitera, D.J., Pflieger, B.F., Keasling, J.D., 2008. Application of Functional Genomics to

- 543 Pathway Optimization for Increased Isoprenoid Production. *Appl. Environ. Microbiol.* 74,  
544 3229–3241. doi:10.1128/AEM.02750-07
- 545 Kosuri, S., Goodman, D.B., Cambray, G., Mutalik, V.K., Gao, Y., Arkin, A.P., Endy, D.,  
546 Church, G.M., 2013. Composability of regulatory sequences controlling transcription and  
547 translation in *Escherichia coli*. *Proc. Natl. Acad. Sci. U. S. A.* 110, 14024–9.  
548 doi:10.1073/pnas.1301301110
- 549 Kurnasov, O. V, Polanuyer, B.M., Ananta, S., Sloutsky, R., Tam, A., Gerdes, S.Y., Osterman,  
550 A.L., 2002. Ribosylnicotinamide kinase domain of NadR protein: identification and  
551 implications in NAD biosynthesis. *J. Bacteriol.* 184, 6906–17. doi:10.1128/JB.184.24.6906-  
552 6917.2002
- 553 Linger, J.G., Vardon, D.R., Guarnieri, M.T., Karp, E.M., Hunsinger, G.B., Franden, M.A.,  
554 Johnson, C.W., Chupka, G., Strathmann, T.J., Pienkos, P.T., Beckham, G.T., 2014. Lignin  
555 valorization through integrated biological funneling and chemical catalysis. *Proc. Natl.*  
556 *Acad. Sci. U. S. A.* 111, 12013–8. doi:10.1073/pnas.1410657111
- 557 Ma, Z.-Q., Dasari, S., Chambers, M.C., Litton, M.D., Sobecki, S.M., Zimmerman, L.J., Halvey,  
558 P.J., Schilling, B., Drake, P.M., Gibson, B.W., Tabb, D.L., 2009. IDPicker 2.0: Improved  
559 protein assembly with high discrimination peptide identification filtering. *J. Proteome Res.*  
560 8, 3872–3881. doi:10.1021/pr900360j
- 561 MacPherson, I.S., Kirubakaran, S., Gorla, S.K., Riera, T. V., D’Aquino, J.A., Zhang, M., Cuny,  
562 G.D., Hedstrom, L., 2010. The Structural Basis of Cryptosporidium-Specific IMP  
563 Dehydrogenase Inhibitor Selectivity. *J. Am. Chem. Soc.* 132, 1230–1231.  
564 doi:10.1021/ja909947a
- 565 Makowska-Grzyska, M., Kim, Y., Maltseva, N., Osipiuk, J., Gu, M., Zhang, M., Mandapati, K.,  
566 Gollapalli, D.R., Gorla, S.K., Hedstrom, L., Joachimiak, A., 2015. A Novel Cofactor-  
567 binding Mode in Bacterial IMP Dehydrogenases Explains Inhibitor Selectivity. *J. Biol.*  
568 *Chem.* 290, 5893–5911. doi:10.1074/jbc.M114.619767
- 569 Meiler, J., Baker, D., 2006. ROSETTALIGAND: Protein-small molecule docking with full side-  
570 chain flexibility. *Proteins Struct. Funct. Bioinforma.* 65, 538–548. doi:10.1002/prot.21086
- 571 Michener, J.K., Camargo Neves, A.A., Vuilleumier, S., Bringel, F., Marx, C.J., 2014. Effective  
572 use of a horizontally-transferred pathway for dichloromethane catabolism requires post-  
573 transfer refinement. *Elife* 3. doi:10.7554/eLife.04279

- 574 Michener, J.K., Nielsen, J., Smolke, C.D., 2012. Identification and treatment of heme depletion  
575 attributed to overexpression of a lineage of evolved P450 monooxygenases. *Proc. Natl.*  
576 *Acad. Sci.* 109, 19504–19509. doi:10.1073/pnas.1212287109
- 577 Mills, T.Y., Sandoval, N.R., Gill, R.T., 2009. Cellulosic hydrolysate toxicity and tolerance  
578 mechanisms in *Escherichia coli*. *Biotechnol. Biofuels* 2, 26. doi:10.1186/1754-6834-2-26
- 579 Mukhopadhyay, A., 2015. Tolerance engineering in bacteria for the production of advanced  
580 biofuels and chemicals. *Trends Microbiol.* 23, 498–508.  
581 doi:<http://dx.doi.org/10.1016/j.tim.2015.04.008>
- 582 Nielsen, J., Keasling, J.D., 2016. Engineering Cellular Metabolism. *Cell* 164, 1185–1197.  
583 doi:10.1016/j.cell.2016.02.004
- 584 Otani, H., Lee, Y.-E., Casabon, I., Eltis, L.D., 2014. Characterization of p-hydroxycinnamate  
585 catabolism in a soil Actinobacterium. *J. Bacteriol.* 196, 4293–303. doi:10.1128/JB.02247-14
- 586 Pál, C., Papp, B., Lercher, M.J., 2005. Adaptive evolution of bacterial metabolic networks by  
587 horizontal gene transfer. *Nat. Genet.* 37, 1372–1375. doi:10.1038/ng1686
- 588 Park, J.O., Rubin, S.A., Xu, Y.-F., Amador-Noguez, D., Fan, J., Shlomi, T., Rabinowitz, J.D.,  
589 2016. Metabolite concentrations, fluxes and free energies imply efficient enzyme usage.  
590 *Nat. Chem. Biol.* 12, 482–489. doi:10.1038/nchembio.2077
- 591 Parke, D., Ornston, L.N., 2003. Hydroxycinnamate (hca) Catabolic Genes from *Acinetobacter*  
592 *sp.* Strain ADP1 Are Repressed by HcaR and Are Induced by Hydroxycinnamoyl-  
593 Coenzyme A Thioesters. *Appl. Environ. Microbiol.* 69, 5398–5409.  
594 doi:10.1128/AEM.69.9.5398-5409.2003
- 595 Pisithkul, T., Jacobson, T.B., O'Brien, T.J., Stevenson, D.M., Amador-Noguez, D., 2015.  
596 Phenolic Amides Are Potent Inhibitors of De Novo Nucleotide Biosynthesis. *Appl. Environ.*  
597 *Microbiol.* 81, 5761–72. doi:10.1128/AEM.01324-15
- 598 Porse, A., Schou, T.S., Munck, C., Ellabaan, M.M.H., Sommer, M.O.A., 2018. Biochemical  
599 mechanisms determine the functional compatibility of heterologous genes. *Nat. Commun.* 9,  
600 522. doi:10.1038/s41467-018-02944-3
- 601 Ragauskas, A.J., Beckham, G.T., Bidy, M.J., Chandra, R., Chen, F., Davis, M.F., Davison,  
602 B.H., Dixon, R.A., Gilna, P., Keller, M., Langan, P., Naskar, A.K., Saddler, J.N.,  
603 Tschaplinski, T.J., Tuskan, G.A., Wyman, C.E., 2014. Lignin valorization: improving lignin  
604 processing in the biorefinery. *Science* 344, 1246843. doi:10.1126/science.1246843

- 605 Rodriguez, A., Salvachua, D., Katahira, R., Black, B.A., Cleveland, N.S., Reed, M.L., Smith, H.,  
606 Baidoo, E.E.K., Keasling, J.D., Simmons, B.A., Beckham, G.T., Gladden, J.M., 2017. Base-  
607 catalyzed depolymerization of solid lignin-rich streams enables microbial conversion. ACS  
608 Sustain. Chem. Eng. *acssuschemeng.7b01818*. doi:10.1021/acssuschemeng.7b01818
- 609 Salis, H.M., Mirsky, E.A., Voigt, C.A., 2009. Automated design of synthetic ribosome binding  
610 sites to control protein expression. *Nat. Biotechnol.* 27, 946–950. doi:10.1038/nbt.1568
- 611 Saxer, G., Krepps, M.D., Merkley, E.D., Ansong, C., Deatherage Kaiser, B.L., Valovska, M.-T.,  
612 Ristic, N., Yeh, P.T., Prakash, V.P., Leiser, O.P., Nakhleh, L., Gibbons, H.S., Kreuzer,  
613 H.W., Shamoo, Y., 2014. Mutations in Global Regulators Lead to Metabolic Selection  
614 during Adaptation to Complex Environments. *PLoS Genet.* 10, e1004872.  
615 doi:10.1371/journal.pgen.1004872
- 616 Song, Y., DiMaio, F., Wang, R.Y.-R., Kim, D., Miles, C., Brunette, T., Thompson, J., Baker, D.,  
617 2013. High-Resolution Comparative Modeling with RosettaCM. *Structure* 21, 1735–1742.  
618 doi:10.1016/J.STR.2013.08.005
- 619 Standaert, R.F., Giannone, R.J., Michener, J.K., 2018. Identification of parallel and divergent  
620 optimization solutions for homologous metabolic enzymes. *Metab. Eng. Commun.* 6, 56–  
621 62. doi:10.1016/J.METENO.2018.04.002
- 622 Tabb, D.L., Fernando, C.G., Chambers, M.C., 2007. MyriMatch: highly accurate tandem mass  
623 spectral peptide identification by multivariate hypergeometric analysis. *J. Proteome Res.* 6,  
624 654–61. doi:10.1021/pr0604054
- 625 Tschaplinski, T.J., Standaert, R.F., Engle, N.L., Martin, M.Z., Sangha, A.K., Parks, J.M., Smith,  
626 J.C., Samuel, R., Jiang, N., Pu, Y., Ragauskas, A.J., Hamilton, C.Y., Fu, C., Wang, Z.-Y.,  
627 Davison, B.H., Dixon, R.A., Mielenz, J.R., 2012. Down-regulation of the caffeic acid O-  
628 methyltransferase gene in switchgrass reveals a novel monolignol analog. *Biotechnol.*  
629 *Biofuels* 5, 71. doi:10.1186/1754-6834-5-71
- 630 Wang, W., Papov, V. V., Minakawa, N., Matsuda, A., Biemann, K., Hedstrom, L., 1996.  
631 Inactivation of Inosine 5'-Monophosphate Dehydrogenase by the Antiviral Agent 5-  
632 Ethynyl-1-β- d -Ribofuranosylimidazole-4-Carboxamide 5'-Monophosphate †.  
633 *Biochemistry* 35, 95–101. doi:10.1021/bi951499q
- 634 Yi, X., Gu, H., Gao, Q., Liu, Z.L., Bao, J., 2015. Transcriptome analysis of *Zymomonas mobilis*  
635 ZM4 reveals mechanisms of tolerance and detoxification of phenolic aldehyde inhibitors

636 from lignocellulose pretreatment. *Biotechnol. Biofuels* 8, 153. doi:10.1186/s13068-015-  
637 0333-9

638 Zimmermann, L., Stephens, A., Nam, S.-Z., Rau, D., Kübler, J., Lozajic, M., Gabler, F., Söding,  
639 J., Lupas, A.N., Alva, V., 2017. A Completely Reimplemented MPI Bioinformatics Toolkit  
640 with a New HHpred Server at its Core. *J. Mol. Biol.* doi:10.1016/J.JMB.2017.12.007

641

642



643 **Table S1:** Strains used in this study

| Strain | Genotype                                                             | Reference                         |
|--------|----------------------------------------------------------------------|-----------------------------------|
| JME17  | BW25113 <i>ompT::pcaHGBDC</i><br><i>pf1B::pcaJFK</i>                 | Clarkson et al., 2017             |
| JME38  | JME17 <i>gfcAB::pobA</i>                                             | Standaert, Giannone, and Michener |
| JME50  | JME17 <i>elfC::pral</i>                                              | Clarkson et al., 2017             |
| JME64  | JME38 <i>chiA::hcaABCK</i>                                           | This work                         |
| JME65  | JME38 <i>ybjH::couLHTMNO</i>                                         | This work                         |
| JME66  | JME50 <i>chiA::hcaABCK</i>                                           | This work                         |
| JME67  | JME50 <i>ybjH::couLHTMNO</i>                                         | This work                         |
| JME82  | JME17 <i>gfcAB::pobA</i> <sup>70</sup>                               | Standaert, Giannone, and Michener |
| JME88  | Evolved variant of JME64                                             | This work                         |
| JME89  | Evolved variant of JME64                                             | This work                         |
| JME92  | Evolved variant of JME64                                             | This work                         |
| JME96  | Evolved variant of JME66                                             | This work                         |
| JME97  | Evolved variant of JME66                                             | This work                         |
| JME98  | Evolved variant of JME66                                             | This work                         |
| JME106 | Evolved variant of JME65                                             | This work                         |
| JME109 | Evolved variant of JME65                                             | This work                         |
| JME111 | Evolved variant of JME67                                             | This work                         |
| JME113 | Evolved variant of JME67                                             | This work                         |
| JME115 | Evolved variant of JME67                                             | This work                         |
| JME129 | JME82 <i>chiA::hcaABCK</i> <sup>89</sup>                             | This work                         |
| JME130 | JME38 <i>guaB(D243G) chiA::hcaABCK</i> <sup>89</sup>                 | This work                         |
| JME131 | JME82 <i>guaB(D243G) chiA::hcaABCK</i> <sup>89</sup>                 | This work                         |
| JME132 | JME82 <i>guaB(D243G) chiA::hcaABCK</i>                               | This work                         |
| JME156 | JME38 <i>nadR(Δ326-410)</i><br><i>ybjH::couLHTMNO</i> <sup>109</sup> | This work                         |
| JME157 | JME82 <i>ybjH::couLHTMNO</i> <sup>109</sup>                          | This work                         |
| JME158 | JME82 <i>nadR(Δ326-410)</i><br><i>ybjH::couLHTMNO</i>                | This work                         |
| JME159 | JME82 <i>nadR(Δ326-410)</i><br><i>ybjH::couLHTMNO</i> <sup>109</sup> | This work                         |

644

645

646 **Table S2:** Plasmids used in this study

| Plasmid | Description                       | Reference                         |
|---------|-----------------------------------|-----------------------------------|
| pCas    | Expresses Cas9 and $\lambda$ -RED | Jiang et al., 2015                |
| pTarget | Expresses sgRNA                   | Jiang et al., 2015                |
| pJM157  | Expresses <i>elfC</i> sgRNA       | Clarkson et al., 2017             |
| pJM168  | Expresses <i>gfcAB</i> sgRNA      | Standaert, Giannone, and Michener |
| pJM187  | Expresses <i>yjbH</i> sgRNA       | This work                         |
| pJM205  | Expresses <i>chiA</i> sgRNA       | This work                         |
| pJM262  | Expresses <i>guaB</i> sgRNA       | This work                         |
| pJM284  | Expresses <i>nadR</i> sgRNA       | This work                         |
| pJM303  | pMCSG7 <i>guaB</i>                | This work                         |

647

648

649  
650

**Table S3:** Primers used in this study

| Name        | Sequence                                                                                                                                                                                                                                                                                                                  | Purpose                             |
|-------------|---------------------------------------------------------------------------------------------------------------------------------------------------------------------------------------------------------------------------------------------------------------------------------------------------------------------------|-------------------------------------|
| pTarget FWD | GTTTTAGAGCTAGAAATAGCAAGTTAAA<br>ATAAG                                                                                                                                                                                                                                                                                     | Inverse PCR of pTarget              |
| pTarget REV | ACTAGTATTATACCTAGGACTGAG                                                                                                                                                                                                                                                                                                  | Inverse PCR of pTarget              |
| yjbH N20F1  | GCCATTGGTCCGTCGCAGT<br>GTTTTAGAGCTAGAAATAGCAAGTTAAA<br>ATAAGGCTAGTC                                                                                                                                                                                                                                                       | Construction of pJM187              |
| yjbH N20R1  | ACTGCGACGGACCAATGGGC<br>ACTAGTATTATACCTAGGACTGAGCTAG<br>CTGTCAAGGATC                                                                                                                                                                                                                                                      | Construction of pJM187              |
| chiA N20F1  | CTGCATCGCTCTTATTGGGA<br>GTTTTAGAGCTAGAAATAGCAAGTTAAA<br>ATAAGGCTAGTC                                                                                                                                                                                                                                                      | Construction of pJM205              |
| chiA N20R1  | TCCAATAAGAGCGATGCAG<br>ACTAGTATTATACCTAGGACTGAGCTAG<br>CTGTCAAGGATC                                                                                                                                                                                                                                                       | Construction of pJM205              |
| guaB N20F1  | CAGCAGAACGTCAACGCCTG<br>GTTTTAGAGCTAGAAATAGCAAGTTAAA<br>ATAAGGCTAGTC                                                                                                                                                                                                                                                      | Construction of pJM262              |
| guaB N20R1  | CAGGCGTTGACGTTCTGCTG<br>ACTAGTATTATACCTAGGACTGAGCTAG<br>CTGTCAAGGATC                                                                                                                                                                                                                                                      | Construction of pJM262              |
| nadR N20F1  | TATGTCTTTTCACACCTCGG<br>GTTTTAGAGCTAGAAATAGCAAGTTAAA<br>ATAAGGCTAGTC                                                                                                                                                                                                                                                      | Construction of pJM284              |
| nadR N20R1  | CCGAGGTGTGAAAAGACATA<br>ACTAGTATTATACCTAGGACTGAGCTAG<br>CTGTCAAGGATC                                                                                                                                                                                                                                                      | Construction of pJM284              |
| yjbH FWD    | CAATCTTGATCCCGATATCGTCC                                                                                                                                                                                                                                                                                                   | Amplification of <i>yjbH</i> locus  |
| yjbH REV    | CCATTCAGGTGATTCACAGC                                                                                                                                                                                                                                                                                                      | Amplification of <i>yjbH</i> locus  |
| chiA FWD    | GCTTACGAGTAAGTCAAAAAACAC                                                                                                                                                                                                                                                                                                  | Amplification of <i>chiA</i> locus  |
| chiA REV    | GGTTGTTACCCTGATCCACC                                                                                                                                                                                                                                                                                                      | Amplification of <i>chiA</i> locus  |
| guaB FWD    | GTTTGACGACGTTCTCCTC                                                                                                                                                                                                                                                                                                       | Amplification of <i>guaB</i> locus  |
| guaB REV    | CTTATTCCGAGGCAAGTGAAAC                                                                                                                                                                                                                                                                                                    | Amplification of <i>guaB</i> locus  |
| dnadR       | GCTGAAAAGGGATCCAGCCGGATCTG<br>ATCTACACCTCGGAAGAAGCCGATGCGC<br>CACAGTATATGGAACATCTGGGGATCGA<br>GACGGTGCTGGTTCGATCCGAAACGTACC<br>TTTATGAGTATCAGCGGTGCGCAGATCC<br>GCGAAAACCCGTTCCGCTACTGGGATAT<br>ATTCCTACCGAAGTGATGGGGGAGCAG<br>AGATAACCGTGATGAAACTGCTCAAAG<br>GCGAGGTATAAAATGAGTTTTTTTGATG<br>AGTTGAAAACCTCTCTGGAAGAGGCTGT | Template for <i>nadR</i> truncation |

|                |                                                                               |                        |
|----------------|-------------------------------------------------------------------------------|------------------------|
|                | CGAGATTAACAAGGTTTGAAAAAACCT<br>GCACGGGTGACCCGCCACGAAATTGAG<br>GATGCTAAGGCTGTT |                        |
| pJM303 FWD     | TACCGAGAACCTGTACTTCCAATCC<br>CTACGTATCGCTAAAGAAGCTCTGAC                       | Construction of pJM303 |
| pJM303 REV     | GATCCGTTATCCACTTCCAATGTCA<br>GGAGCCCAGACGGTAGTTC                              | Construction of pJM303 |
| pMCSG7<br>InvF | TGACATTGGAAGTGGATAACGG                                                        | Inverse PCR of pMCSG7  |
| pMCSG7<br>InvR | GGATTGGAAGTACAGGTTCTCG                                                        | Inverse PCR of pMCSG7  |

651

652

653 **Table S4:** Mutations identified. All nucleotide references are relative to the appropriate parental  
654 strain.

| Strain | Nucleotide Mutation                 | Notes                                                 |
|--------|-------------------------------------|-------------------------------------------------------|
| JME88  | G34,380A                            | <i>rho</i> R109H                                      |
|        | A247,081C                           | <i>rpoB</i> H551P                                     |
|        | C1,750,524T                         | Silent mutation in <i>pobA</i>                        |
|        | G3,331,225A                         | <i>guaB</i> P482L                                     |
|        | G4,171,829A                         | Intergenic region between <i>hcaB</i> and <i>hcaC</i> |
|        | Duplication, 3,888,763 to 4,187,739 | Contains <i>hcaABCK</i>                               |
| JME89  | Duplication, 1,276,815 to 1,393,953 | Contains <i>pcaHGBDC</i>                              |
|        | G1,750,827T                         | Silent mutation in <i>pobA</i>                        |
|        | T3,331,942C                         | <i>guaB</i> D243G                                     |
|        | Δ(3,565,666-3,565,671)              | 6nt deletion in <i>rpoS</i>                           |
|        | Insertion at 3,979,270              | TTCAACA insertion into <i>prlF</i>                    |
|        | G4,170,364A                         | Silent mutation in <i>hcaB</i>                        |
|        | G4,171,829A                         | Intergenic region between <i>hcaB</i> and <i>hcaC</i> |
| JME92  | G1,750,709A                         | Silent mutation in <i>pobA</i>                        |
|        | G3,331,711T                         | <i>guaB</i> A320D                                     |
|        | C4,170,144A                         | <i>hcaB</i> L6M                                       |
|        | G4,171,829A                         | Intergenic region between <i>hcaB</i> and <i>hcaC</i> |
|        | Duplication, 4,068,491 to 4,181,314 | Contains <i>hcaABCK</i>                               |
| JME96  | A3,570,881T                         | <i>rpoS</i> I128N                                     |
| JME97  | G3,337,640A                         | <i>guaB</i> A48V                                      |
|        | Δ(4,176,251-4,176,250)              | Intergenic region between <i>hcaB</i> and <i>hcaC</i> |
| JME98  | G34,359T                            | <i>rho</i> (R109L)                                    |
|        | G253,205A                           | <i>rpoC</i> (E1152K)                                  |
|        | Δ(3,673,353-3,670,054)              | 7nt deletion in <i>ptsP</i>                           |
| JME106 | T302,571G                           | <i>couL</i> (L192R)                                   |
|        | Δ(607,091)                          | Frameshift in <i>nadR</i>                             |
|        | A3,570,508G                         | <i>rpoS</i> (L175P)                                   |
| JME109 | C302,420A                           | <i>couL</i> (S134Y)                                   |
|        | T697,300G                           | <i>nadR</i> (L344R)                                   |
|        | Duplication, 1,743,292 to 1,756,987 | Contains <i>pobA</i>                                  |
|        | T4,463,784G                         | <i>selA</i> (Q947P)                                   |
| JME111 | Δ(1,853,703)                        | Frameshift in <i>rne</i>                              |
|        | G3,576,757T                         | <i>rpoS</i> (R421S)                                   |
| JME113 | A328,937C                           | <i>zur</i> (Y45D)                                     |
|        | Δ(981,416-1,087,723)                | Contains <i>lacY</i>                                  |
|        | Duplication, 4,362,839 to 567,227   | Contains <i>couLHTMNO</i> . Inserted into <i>mnmG</i> |

|        |                                   |                                                      |
|--------|-----------------------------------|------------------------------------------------------|
| JME115 | Duplication, 861,438 to 980,777   |                                                      |
|        | Insertion at 3,986,892            | TTCAACA insertion into <i>prlF</i>                   |
|        | G4,086,003A                       | <i>sspA</i> (A4V)                                    |
|        | Duplication, 4,362,839 to 567,227 | Contains <i>couLHTMNO</i> . Inserted into <i>mmG</i> |

655

656

657 **Table S5:** Kinetic Parameters for *Ec*IMPDH/WT, *Ec*IMPDH/D243G and *Ab*IMPDH. The values  
658 are the average and range of two independent experiments.  
659

|                                            | <i>Ec</i> IMPDH/WT | <i>Ec</i> IMPDH/D243G | <i>Ab</i> IMPDH  |
|--------------------------------------------|--------------------|-----------------------|------------------|
| $k_{\text{cat}}$ ( $\text{s}^{-1}$ )       | $0.97 \pm 0.05$    | $0.50 \pm 0.04$       | $0.86 \pm 0.02$  |
| $K_{\text{m}}$ (IMP) ( $\mu\text{M}$ )     | $21 \pm 3$         | $7.9 \pm 1$           | $16 \pm 3$       |
| $K_{\text{m}}$ (NAD) ( $\mu\text{M}$ )     | $210 \pm 20$       | $210 \pm 40$          | $208 \pm 17$     |
| $K_{\text{ii}}$ (NAD) ( $\mu\text{M}$ )    | $4300 \pm 530$     | $3500 \pm 690$        | $10600 \pm 1100$ |
| $K_{\text{i,app}}$ (4HB) ( $\mu\text{M}$ ) | $320 \pm 30$       | $1250 \pm 50$         | $720 \pm 30$     |

660

661

662 **Table S6:** Crystallographic templates used to model IMPDH from *E. coli*

663

| PDB entry | Organism                      | Resolution (Å) | E value | % identity | Cofactors/ligands      |
|-----------|-------------------------------|----------------|---------|------------|------------------------|
| 4X3Z      | <i>Vibrio cholerae</i>        | 1.62           | 3.3e-34 | 86         | NAD <sup>+</sup> , XMP |
| 1ZFJ      | <i>Streptococcus pyogenes</i> | 1.90           | 9.8e-55 | 56         | IMP                    |
| 5AHN      | <i>Pseudomonas aeruginosa</i> | 1.65           | 4.8e-59 | 66         | IMP                    |
| 2CU0      | <i>Pyrococcus horikoshii</i>  | 2.10           | 2.9e-47 | 49         | XMP                    |
| 1VRD      | <i>Thermotoga maritima</i>    | 2.18           | 8.3e-47 | 56         | n/a                    |

664

665



**Table S7:** Binding energies<sup>a</sup> for the top five poses obtained from docking 4-hydroxybenzaldehyde to the apoenzyme, IMP-bound, and IMP/NAD<sup>+</sup>-bound states of IMPDH.

| <i>interface_delta</i> (Rosetta energy units) |           |                             |
|-----------------------------------------------|-----------|-----------------------------|
| apoenzyme                                     | IMP-bound | IMP/NAD <sup>+</sup> -bound |
| -11.5                                         | -12.4     | -10.3                       |
| -11.0                                         | -12.2     | -9.4                        |
| -10.6                                         | -12.1     | -9.3                        |
| -10.6                                         | -12.1     | -8.9                        |
| -10.5                                         | -11.4     | -8.7                        |

666 <sup>a</sup> *interface\_delta*

667

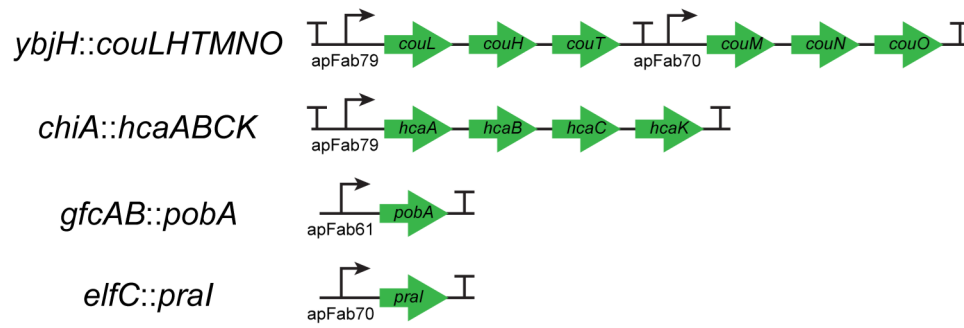

668

669 **Figure S1:** Construct designs. Sequences were synthesized *de novo* and inserted into the

670 indicated chromosomal locus.

671

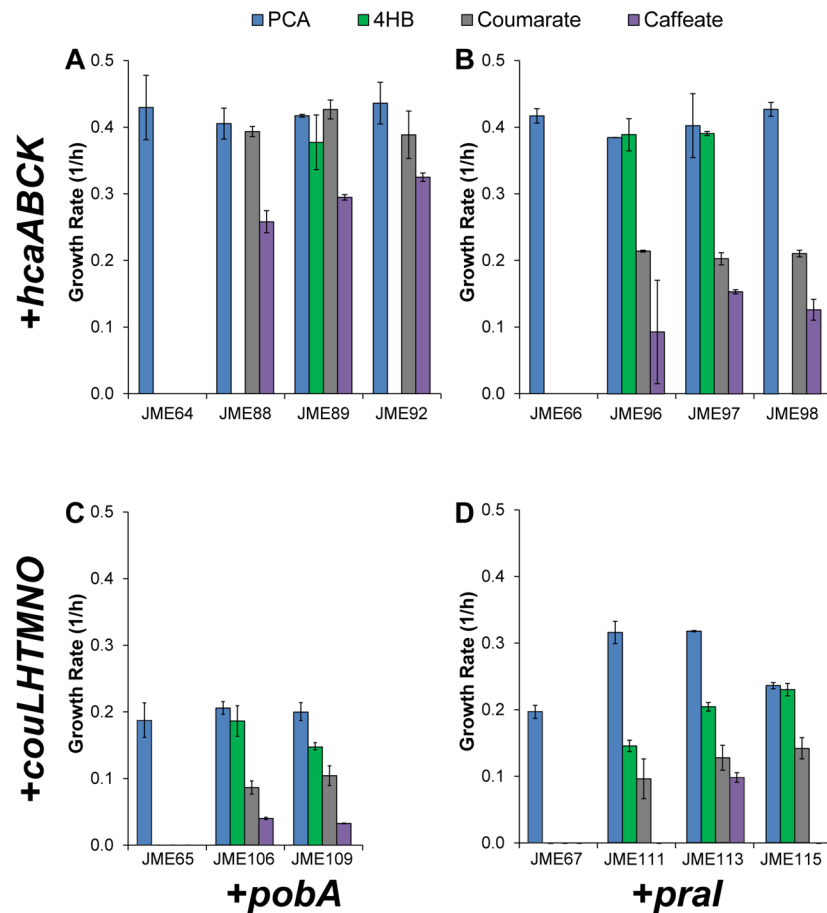

672

673 **Figure S2:** A combination of engineering and evolution are necessary for growth with  
674 coumarate. Engineered strains (JME64, JME65, JME66, and JME67) and their evolved  
675 derivatives were grown in minimal media containing 1 g/L of the indicated substrate. Each panel  
676 represents a different combination of phenylpropanoid pathway (A and B: *hca*, C and D: *cou*)  
677 and 4-HB monooxygenase (A and C: *pobA*, B and D: *pral*). Error bars show one standard  
678 deviation, calculated from three biological replicates.

679

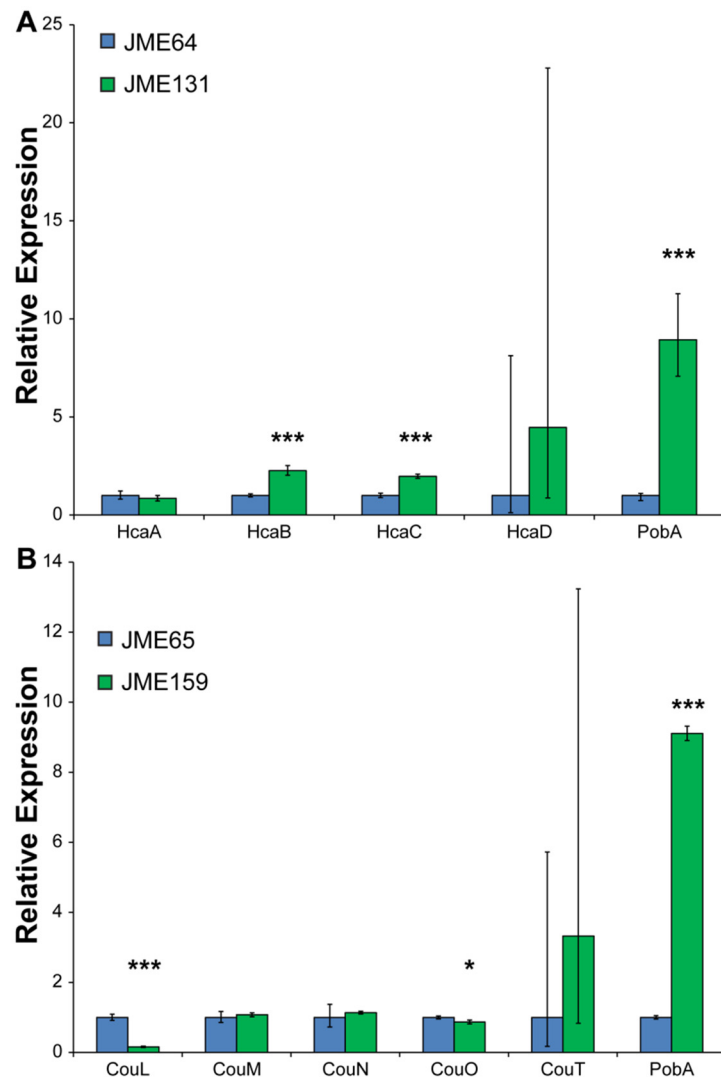

680

681 **Figure S3:** Pathway mutations affect enzyme expression. (A) In strains with the *hca* pathway, an  
682 intergenic mutation between *hcaB* and *hcaC* increases expression of both enzymes, while a silent  
683 mutation to *pobA* also increases expression of that enzyme. Strain JME64 has the wild-type  
684 allele for both constructs, while JME131 has both mutations. Error bars show one standard  
685 deviation, calculated from three biological replicates. \*\*\*:  $p < 0.001$ .

686

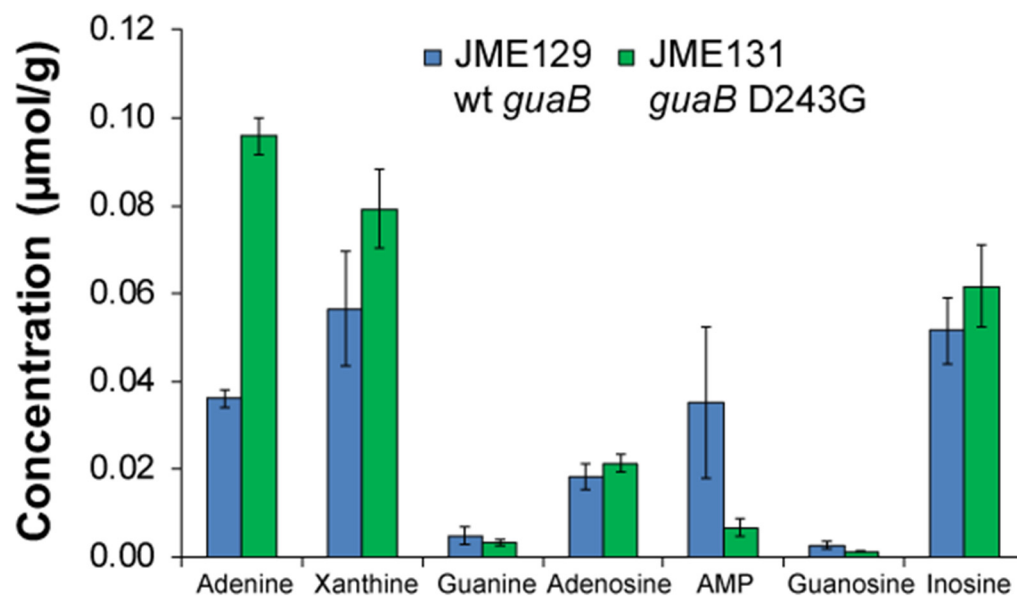

687  
688  
689  
690  
691  
692

**Figure S4:** Metabolomics of purine nucleobases and derivatives. Concentrations of GMP, XMP, and IMP were below the limit of detection. Concentrations are reported in  $\mu\text{mol/g}$  fresh weight sorbitol equivalent. Error bars show one standard deviation, calculated from four biological replicates.

693

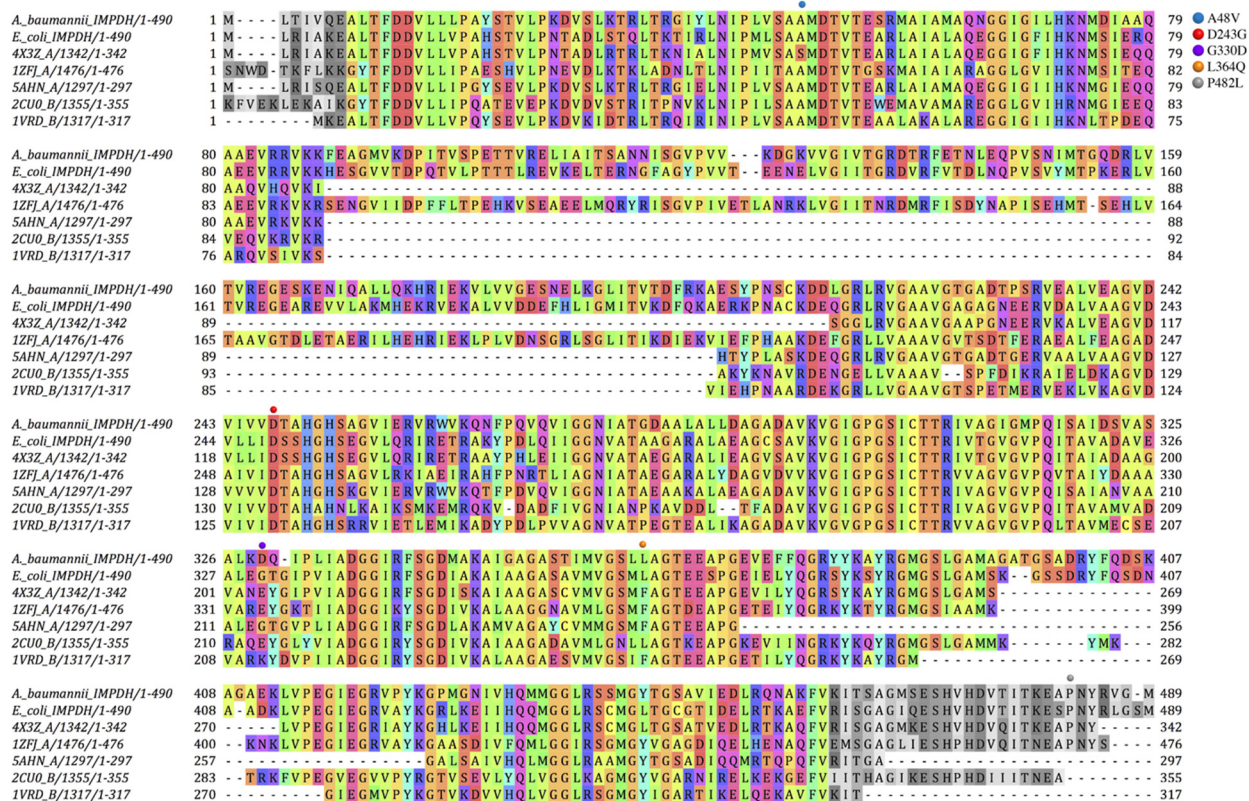

694

695

696 **Figure S5:** MAFFT (L-INS-i) multiple sequence alignment of IMPDH from *A. baumannii*, *E.*

697 *coli*, and multiple template sequences used for structural modeling of the *E. coli* IMPDH.

698 Selected residues (gray) were trimmed at the N- and C-termini and were not included in the

699 models.

700

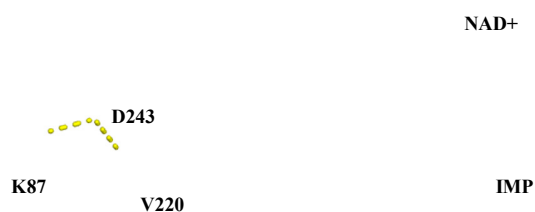

701  
702 **Figure S6:** Local environment of D243 in the model of *E. coli* wild-type IMPDH. The  
703 carboxylate side chain of D243 forms hydrogen bonds with the side chain of K87 and the  
704 backbone of V220. K87 is located at the C-terminal end of a long  $\alpha$  helix, and V220 is at the  
705 beginning of a  $\beta$  strand (shown in maroon). Carbons of K87, V220 and D243 are shown in gray,  
706 and carbons of IMP and NAD<sup>+</sup> are shown in yellow.  
707

## 708 **Example options file for comparative modeling**

```
709 -in:file:fasta input/t000_.fasta
710 -parser:protocol input/rosetta_cm.xml
711 -relax:minimize_bond_angles
712 -relax:minimize_bond_lengths
713 -default_max_cycles 200
714 -relax:min_type lbfgs_armijo_nonmonotone
715 -use_bicubic_interpolation
716 -relax:jump_move true
717 -score:weights input/ref2015_cart.wts
718 -hybridize:stagel_probability 1.0
719 -mute all
720 -nstruct 1000
```

721

## 722 **Example XML file for comparative modeling**

```
723 <ROSETTASCRIPTS>
724     <TASKOPERATIONS>
725 </TASKOPERATIONS>
726     <SCOREFXNS>
727         <ScoreFunction name="stagel" weights="input/stagel.wts"
728             symmetric="1">
729             <Reweight scoretype="atom_pair_constraint" weight="1"/>
730         </ScoreFunction>
731         <ScoreFunction name="stage2" weights="input/stage2.wts"
732             symmetric="1">
733             <Reweight scoretype="atom_pair_constraint" weight="0.5" />
734         </ScoreFunction>
735         <ScoreFunction name="fullatom" weights="input/stage3.wts"
736             symmetric="1">
737             <Reweight scoretype="atom_pair_constraint" weight="0.5" />
738         </ScoreFunction>
739     </SCOREFXNS>
740 <FILTERS>
741 </FILTERS>
742 <MOVERS>
743     <Hybridize name="hybridize" stagel_scorefxn="stagel"
744         stage2_scorefxn="stage2" fa_scorefxn="fullatom"
745         batch="1" stagel_increase_cycles="1.0" stage2_increase_cycles="1.0"
746         linmin_only="1">
747         <Template pdb="input/impdh_on_4X3Z_A.pdb" cst_file="AUTO"
748             weight="1.000" symmdef="input/tetramer_4x3z.symm"/>
749         <Template pdb="input/impdh_on_1ZFJ_A.pdb" cst_file="AUTO"
750             weight="1.000" symmdef="input/tetramer_1zfq.symm"/>
751         <Template pdb="input/try7_cm1_S_0278_A.pdb" cst_file="AUTO"
752             weight="1.000" symmdef="input/tetramer_S_0278.symm"/>
753         <Fragments three_mers="input/aat000_03_05.200_v1_3.txt.gz"
754             nine_mers="input/aat000_09_05.200_v1_3.txt.gz"/>
755     </Hybridize>
756 </MOVERS>
757 <APPLY_TO_POSE></APPLY_TO_POSE>
758 <PROTOCOLS>
759     <Add mover="hybridize">
760 </Add>
761 </PROTOCOLS>
762 </ROSETTASCRIPTS>
763
```



764

### 765 **Example options file for ligand docking**

```
766 -in:file:s 'S_0308_aligned_with_4X3Z_A_1141_zinc.pdb'  
767 -in:file:extra_res_fa IMP.params NAD.params zinc_156709.params  
768 -packing:ex1  
769 -packing:ex2  
770 -packing:no_optH false  
771 -packing:flip_HNQ true  
772 -packing:ignore_ligand_chi true  
773 -parser:protocol dock.xml  
774 -mistakes:restore_pre_talaris_2013_behavior true  
775 -overwrite  
776 -nstruct 1000  
777 -mute all
```

778

### 779 **Example XML file for ligand docking**

```
780 <ROSETTASCRIPTS>  
781   <SCOREFXNS>  
782     <ScoreFunction name="ligand_soft_rep" weights="ligand_soft_rep">  
783       </ScoreFunction>  
784     <ScoreFunction name="hard_rep" weights="ligand">  
785       </ScoreFunction>  
786   </SCOREFXNS>  
787   <LIGAND_AREAS>  
788     <LigandArea name="inhibitor_dock_sc" chain="X" cutoff="6.0"  
789       add_nbr_radius="true" all_atom_mode="false"/>  
790     <LigandArea name="inhibitor_final_sc" chain="X"  
791       cutoff="6.0" add_nbr_radius="true" all_atom_mode="false"/>  
792     <LigandArea name="inhibitor_final_bb" chain="X" cutoff="7.0"  
793       add_nbr_radius="false" all_atom_mode="true"  
794       Calpha_restraints="0.3"/>  
795   </LIGAND_AREAS>  
796   <INTERFACE_BUILDERS>  
797     <InterfaceBuilder name="side_chain_for_docking"  
798       ligand_areas="inhibitor_dock_sc"/>  
799     <InterfaceBuilder name="side_chain_for_final"  
800       ligand_areas="inhibitor_final_sc"/>  
801     <InterfaceBuilder name="backbone"  
802       ligand_areas="inhibitor_final_bb" extension_window="3"/>  
803   </INTERFACE_BUILDERS>  
804   <MOVEMAP_BUILDERS>  
805     <MoveMapBuilder name="docking"  
806       sc_interface="side_chain_for_docking" minimize_water="false"/>  
807     <MoveMapBuilder name="final" sc_interface="side_chain_for_final"  
808       bb_interface="backbone" minimize_water="false"/>  
809   </MOVEMAP_BUILDERS>  
810   <SCORINGGRIDS ligand_chain="X" width="15">  
811     <ClassicGrid grid_name="classic" weight="1.0"/>  
812   </SCORINGGRIDS>  
813   <MOVERS>  
814     <StartFrom name="start_from_X" chain="X">  
815       <Coordinates x="-25.1" y="21.2" z="20.4"/>  
816     </StartFrom>  
817     <Transform name="transform" chain="X" box_size="20.0"  
818       move_distance="0.2" angle="20" cycles="500" repeats="1"  
819       temperature="5"/>
```

```
820         <HighResDocker name="high_res_docker" cycles="6"  
821         repack_every_Nth="3" scorefxn="ligand_soft_rep"  
822         movemap_builder="docking"/>  
823         <FinalMinimizer name="final" scorefxn="hard_rep"  
824         movemap_builder="final"/>  
825         <InterfaceScoreCalculator name="add_scores" chains="X"  
826         scorefxn="hard_rep" />  
827     </MOVERS>  
828     <PROTOCOLS>  
829         <Add mover_name="start_from_X"/>  
830         <Add mover_name="transform"/>  
831         <Add mover_name="high_res_docker"/>  
832         <Add mover_name="final"/>  
833         <Add mover_name="add_scores"/>  
834     </PROTOCOLS>  
835 </ROSETTASCRIPTS>  
836
```
